# Supplementary material
Source: HighWire-hosted journal article supplement (http://www.jneurosci.org/highwire/filestream/599689/field_highwire_adjunct_files/1/Figure_S1.pdf)

## Supplemental Figure 1

|                                                   | AMPA-R assembled from GluR1flip | AMPA-R assembled from resGluR1flip |
|---------------------------------------------------|---------------------------------|------------------------------------|
| 150 $\mu$ M KA (n = 33)                           | 100 %                           | 100 $\pm$ 21%                      |
| 300 $\mu$ M Glu (n=28)                            | 100 %                           | 99 $\pm$ 14%                       |
| KA/Glu (n = 28)                                   | 100 %                           | 110 $\pm$ 28%                      |
| Block of 150 $\mu$ M KA currents by NASP (n = 13) | 100 %                           | 103 $\pm$ 5%                       |

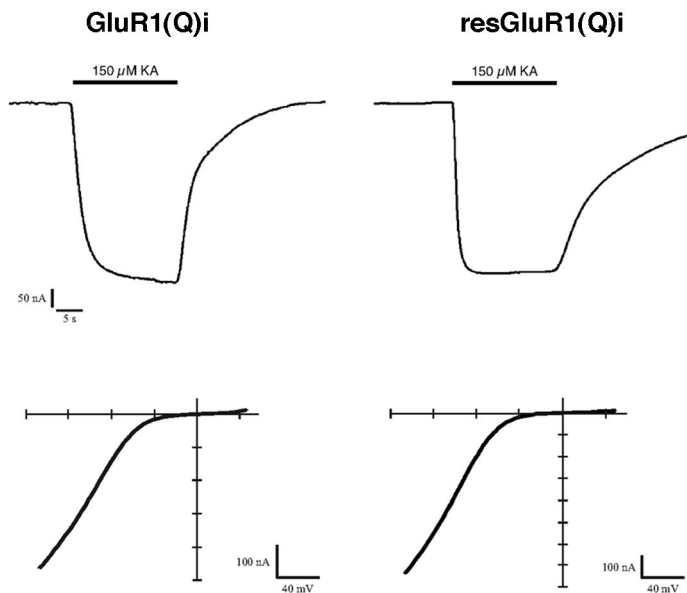

Supplement: Figure_S1.pdf [file Figure_S1.pdf]
